# Supplementary material for: A label-free conjugated polymer-based fluorescence assay for the determination of adenosine triphosphate and alkaline phosphatase
Source: Royal Society of Chemistry journal article supplement (doi:10.1039/c4nj00935e), 2014-01-01
Supplement: c4nj00935e1.pdf [file c4nj00935e1.pdf]

To New Journal of Chemistry.

## Electronic Supplementary Material

### A label-free conjugated polymer-based fluorescence assay for the determination of adenosine triphosphate and alkaline phosphatase

Yanan Li, Yan Li, Xinyan Wang, Xingguang Su\*

Department of Analytical Chemistry, College of Chemistry, Jilin University,  
Changchun, 130012, China 7

\*Corresponding author, Tel.: +86-431-85168352, E-mail address: [suxg@jlu.edu.cn](mailto:suxg@jlu.edu.cn)

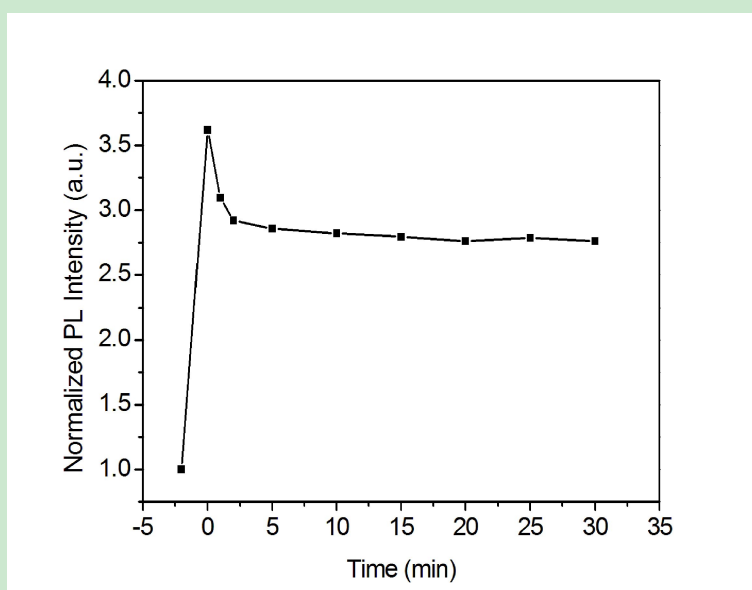

**Fig. S1** Effect of reaction time on the PL intensity of fluorescence turn-on system in the present of  $1.0 \mu\text{mol L}^{-1}$  PPESO<sub>3</sub>,  $10 \mu\text{mol L}^{-1}$  Cu<sup>2+</sup> and  $10 \mu\text{mol L}^{-1}$  ATP at room temperature,  $10 \text{mmol L}^{-1}$  Tris-HCl buffer, pH=7.0.

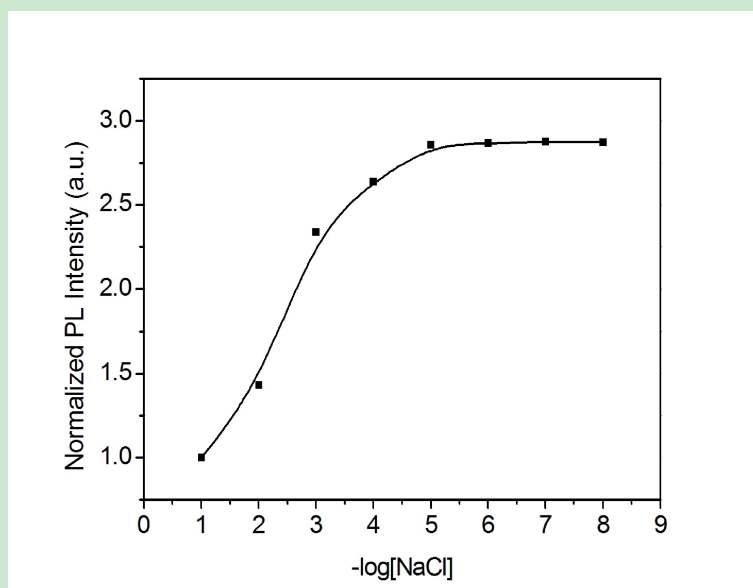

**Fig. S2** Effect of NaCl concentration on the PL intensity of fluorescence turn-on system in the present of  $1.0 \mu\text{mol L}^{-1}$  PPESO<sub>3</sub>,  $10 \mu\text{mol L}^{-1}$  Cu<sup>2+</sup> and  $10 \mu\text{mol L}^{-1}$  ATP at room temperature,  $10 \text{mmol L}^{-1}$  Tris-HCl buffer, pH=7.0.

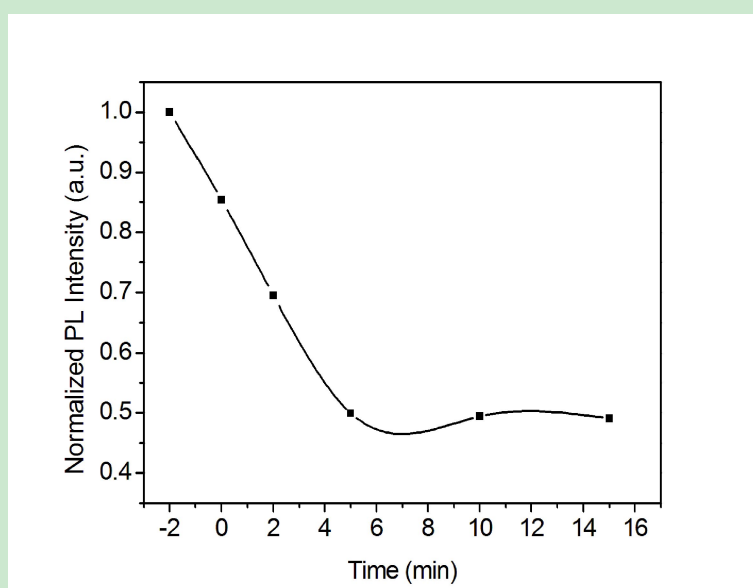

**Fig. S3** Effect of reaction time on the PL intensity of fluorescence turn-off system in the present of  $1.0 \mu\text{mol L}^{-1}$  PPESO<sub>3</sub>,  $10 \mu\text{mol L}^{-1}$  Cu<sup>2+</sup>,  $10 \mu\text{mol L}^{-1}$  ATP and  $1 \text{U mL}^{-1}$  ALP at room temperature,  $10 \text{mmol L}^{-1}$  Tris-HCl buffer, pH=7.0.
